# Supplementary material
Source: bioRxiv or medRxiv preprint supplement (https://www.biorxiv.org/highwire/filestream/18224/field_highwire_adjunct_files/0/066134-1.pdf)
Supplement: Supplementary file [file 066134-1.pdf]

## **Supplementary material**

**Table S1. List of strains used in this study.**

**Table S2. Mass spectrometry data of spatially restricted enzymatic tagging in *C. elegans*.**

**Figure S1. Localization of APX to the intestinal cytoplasm of *C. elegans*.**

**Figure S2. Use of triplex reductive dimethylated samples to quantitatively compare GFP-APX-NES, GFP-APX-NLS, and GFP only samples.**

**Figure S3. Reproducibility of the number of proteins identified from each location.**

**Figure S4. Identification of cytoplasm or nuclear localized proteins.**

**Figure S5. Quantitative mass spectrometry ratios of proteins selected for validation.**

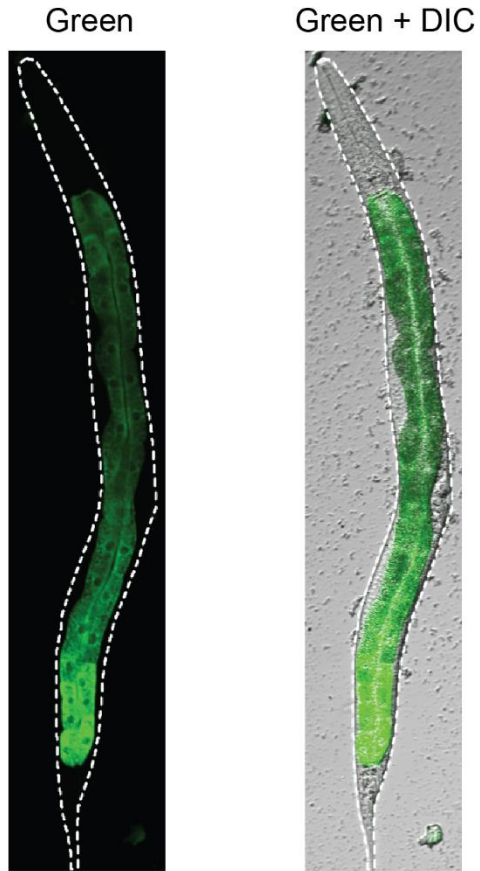

**Figure S1. Localization of APX to the intestinal cytoplasm of *C. elegans*.**

Microscopy of animals expressing GFP-APX-NES under the *spp-5* promoter. This strain of *C. elegans* expresses the APX enzyme fused to GFP in the intestinal cytoplasm. Green is the fluorescence channel and green + DIC (differential interference contrast) is the merged fluorescence and DIC channel.

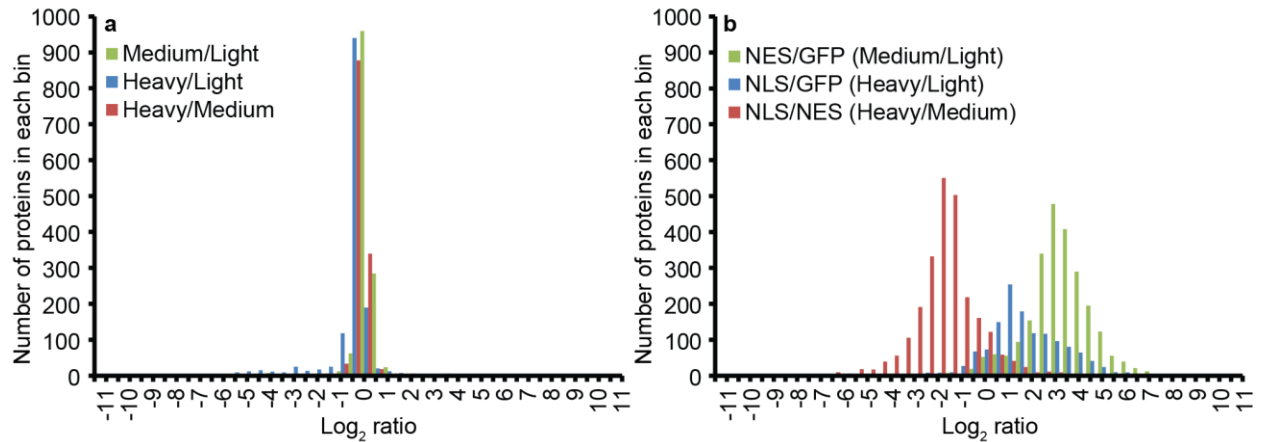

**Figure S2. Use of triplex reductive dimethylated samples to quantitatively compare no APX, APX-NES, and APX-NLS samples.** Animals expressing intestinal APX-NES, APX-NLS, and the GFP-only control were used to perform spatially restricted enzymatic tagging. Biotinylated proteins were isolated and digested into peptides. **a.** Peptides from the three samples were mixed together, split into thirds, with each portion being labeled with a different isotopic label. All the isotopically labeled samples were then mixed back together. Shown is the Log<sub>2</sub> transformed protein abundance ratio. **b.** Peptides from the three samples were each labeled with a different isotopic label. All the isotopically labeled samples were then mixed back together.

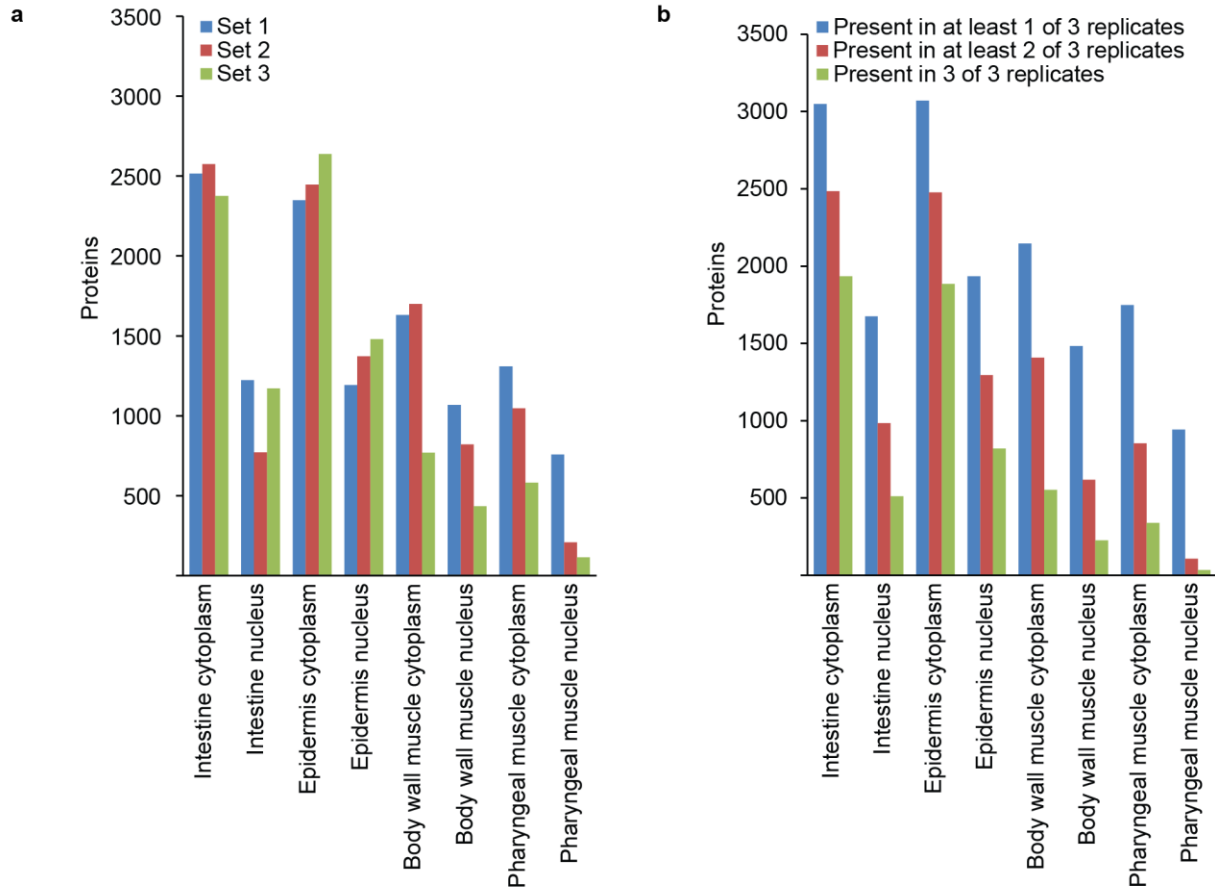

**Figure S3. Reproducibility of the number of proteins identified from each location.** The number of proteins identified from the tissue or subcellular location for each of the eight locations indicated. **a.** Each location shows the number of proteins identified in each set. **b.** Each location shows the number of protein identified in at least 1 of 3 replicates, at least 2 of 3 replicates, or in all three replicates.

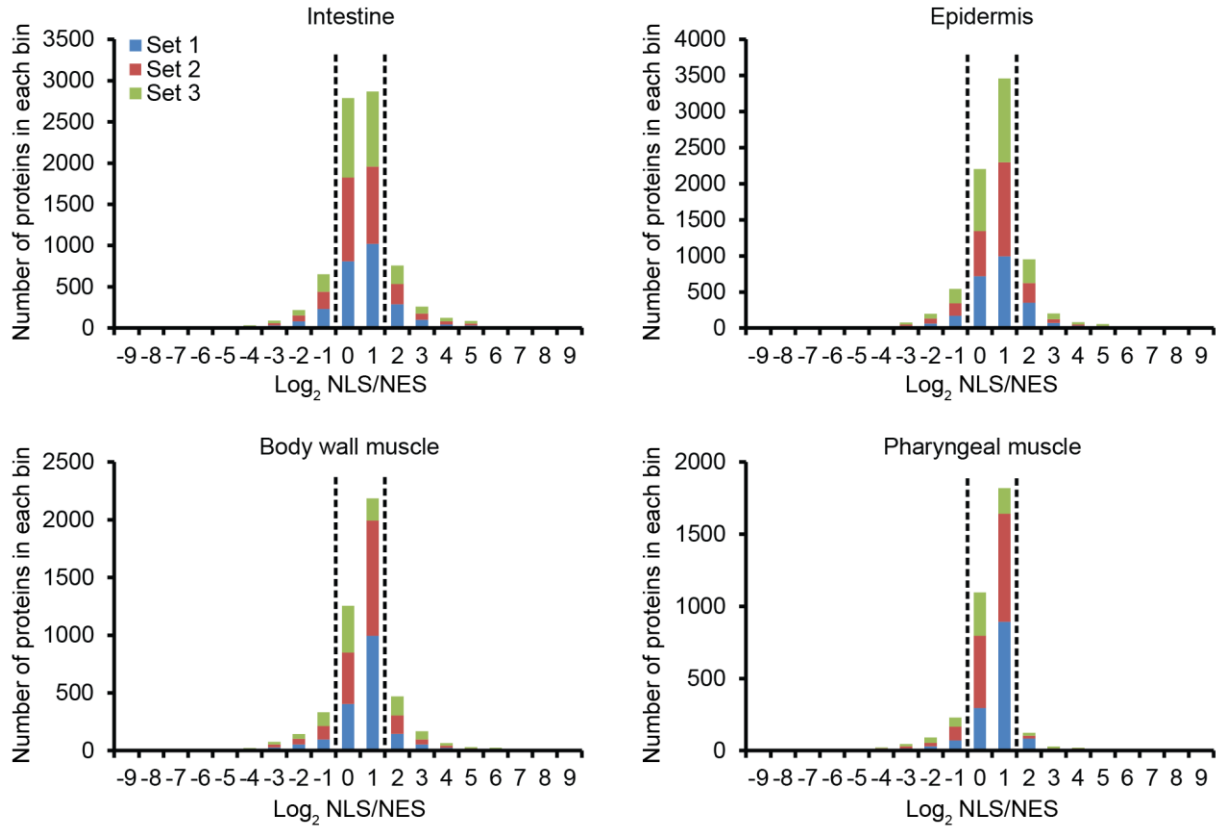

**Figure S4. Identification of cytoplasm or nuclear localized proteins.** Cytoplasm or nuclear localized proteins were determined by examining the quantitative ratios after APX-mediated proximity labeling in the indicated tissue. Shown is the distribution of the Log<sub>2</sub> NLS/NES ratio for proteins from each biological replicate that display NES/GFP ratios greater than 1 or NLS/GFP ratios less than 1 which filters out proteins identified in the control GFP only labeled samples. Dashed lines demarcate the cutoff for being nucleus specific (greater than 1) or cytoplasm specific (less than -1) for each indicated tissue.

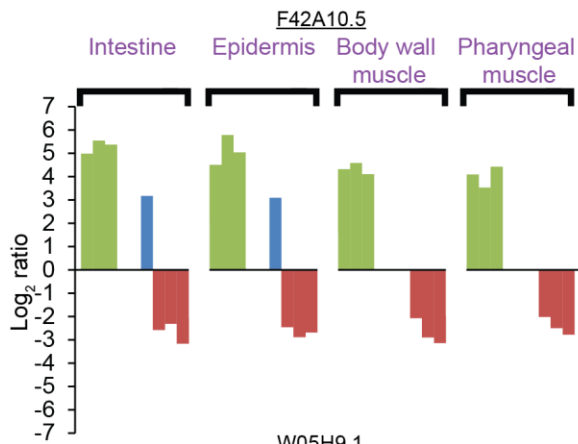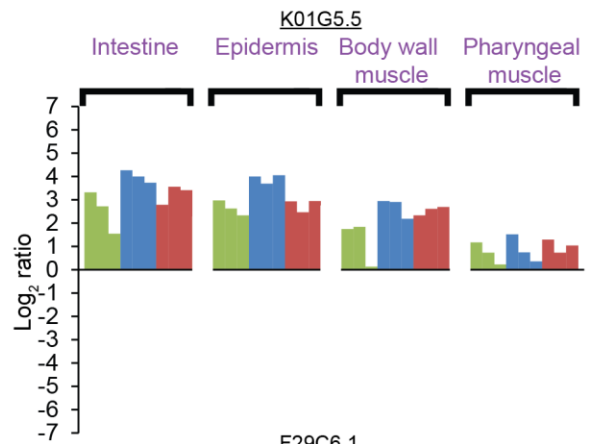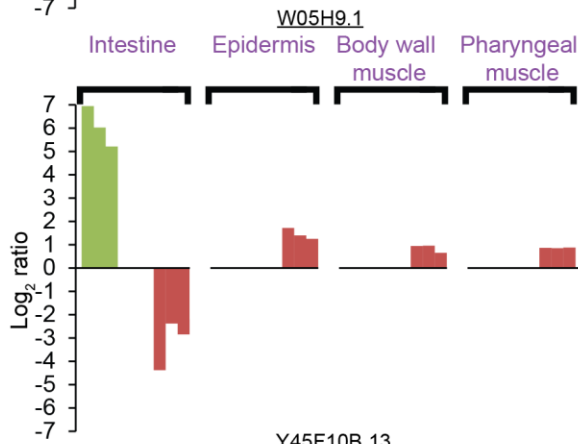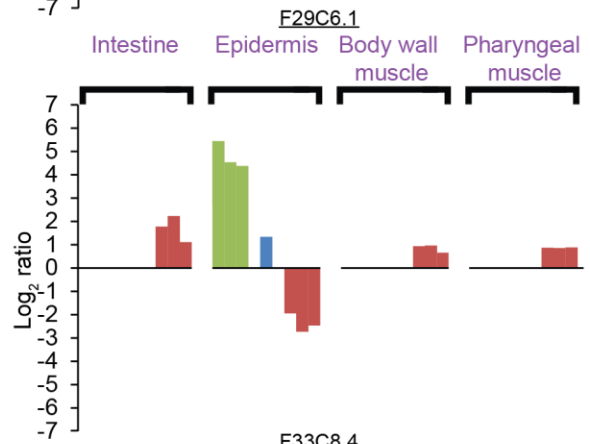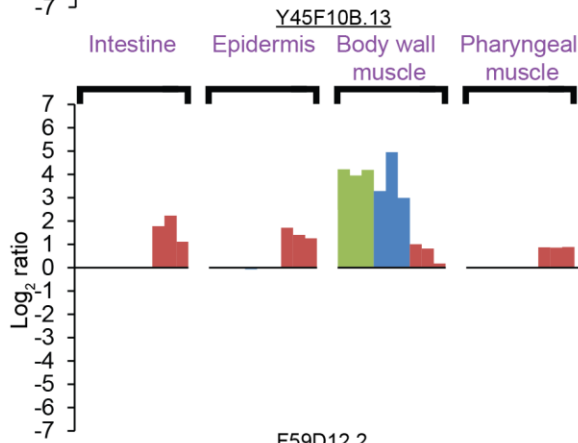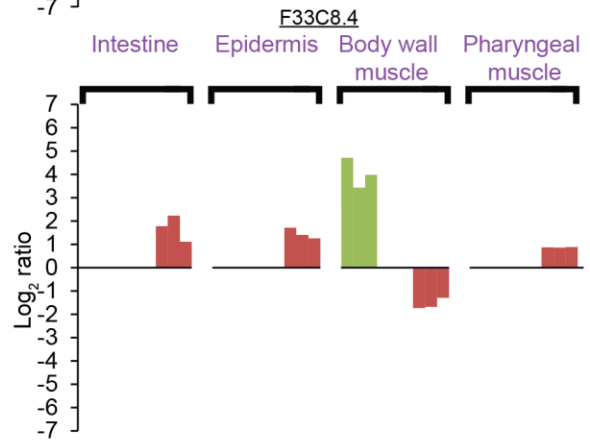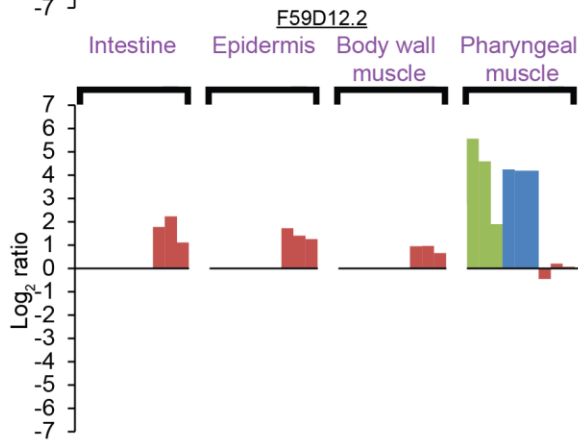

■ NES/GFP  
■ NLS/GFP  
■ NLS/NES

**Figure S5. Quantitative mass spectrometry ratios of proteins selected for validation.** The seven proteins from Figure 5 are shown. For each protein, the NES/GFP, NLS/GFP, and NLS/NES Log<sub>2</sub> ratios from each of the three replicates are shown for each of the four tissues.
